# Supplementary material
Source: Springer Nature journal article supplement (https://www.springermedizin.de/resource/supplementary/13014_2011_409_MOESM3_ESM.pdf/9633714)

After VMAT

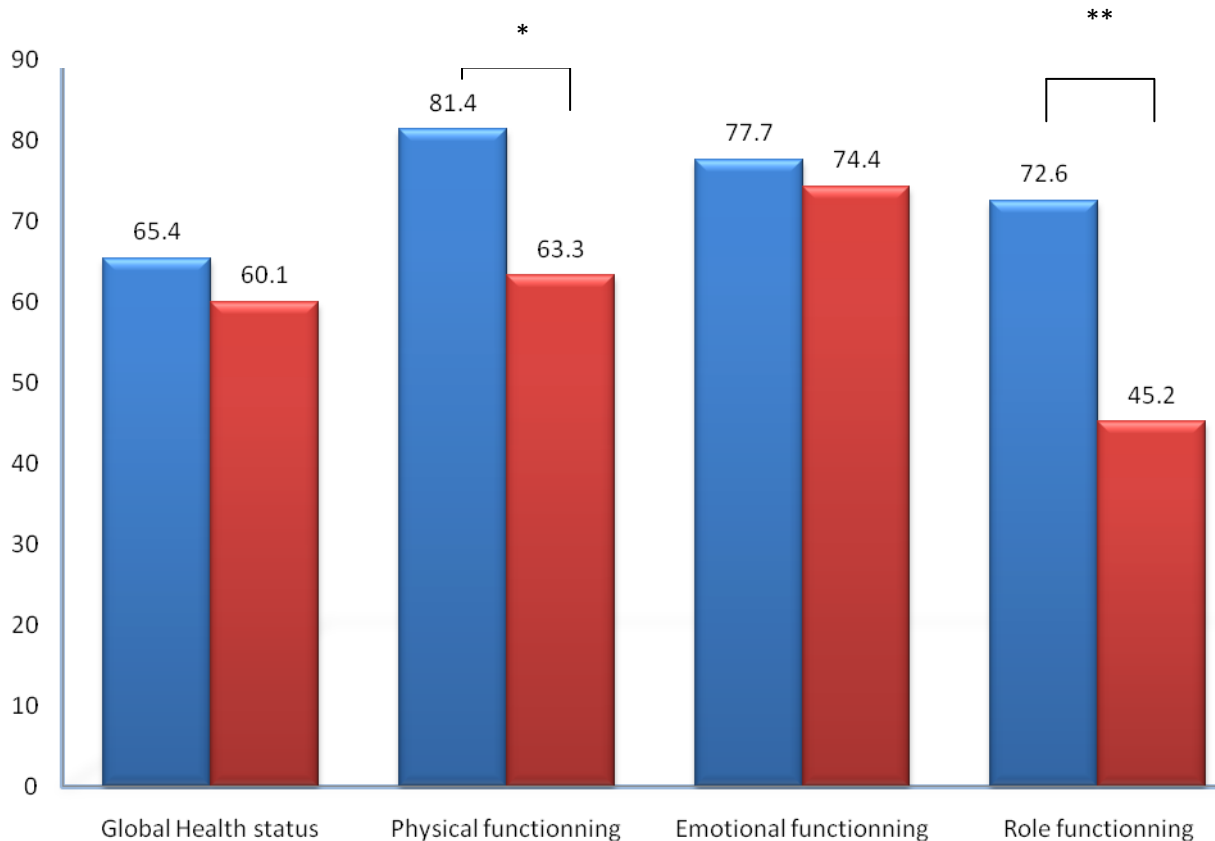

\*  $p=0.05$

\*\*  $p=0.01$

■ Before VMAT

■ 3 Months after VMAT

Supplement: MOESM3 [file 9633714]
